# Supplementary material for: Electro-synthesis of 3D porous hierarchical Ni–Fe phosphate film/Ni foam as a high-efficiency bifunctional electrocatalyst for overall water splitting
Source: Royal Society of Chemistry journal article supplement (doi:10.1039/c6ta05952j), 2016-01-01
Supplement: c6ta05952j1.pdf [file c6ta05952j1.pdf]

## Electronic supplementary information

### Electro-synthesis of 3D porous hierarchical Ni-Fe phosphate film/Ni foam as high-efficiency bifunctional electrocatalyst for overall water splitting

Junheng Xing<sup>a</sup>, Hui Li<sup>b</sup>, Mark Ming-Cheng Cheng<sup>c</sup>, Scott M. Geyer<sup>b</sup> and K. Y. Simon Ng<sup>\*a</sup>

<sup>a</sup> Department of Chemical Engineering and Materials Science, Wayne State University, Detroit, Michigan 48202, United States. \*E-mail address: [sng@wayne.edu](mailto:sng@wayne.edu)

<sup>b</sup> Department of Chemistry, Wake Forest University, Winston-Salem, North Carolina 27109, United States.

<sup>c</sup> Department of Electrical and Computer Engineering, Wayne State University, Detroit, Michigan 48202, United States.

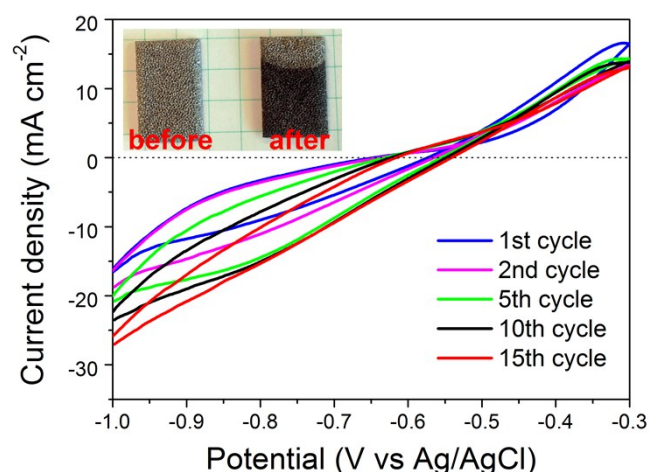

**Figure S1** Electrodeposition of NiFe-P catalysts at CV mode for 15 cycles, inset shows the photograph of Ni foam before and after deposition.

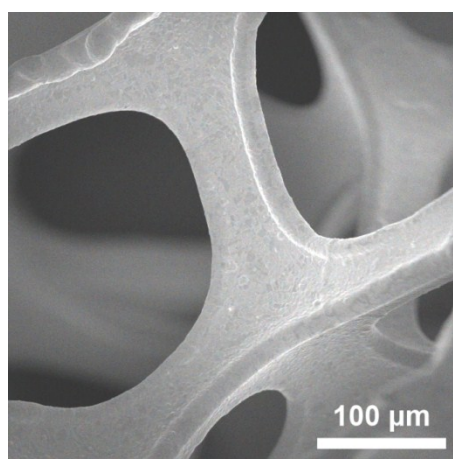

**Figure S2** SEM image of pristine Ni foam.

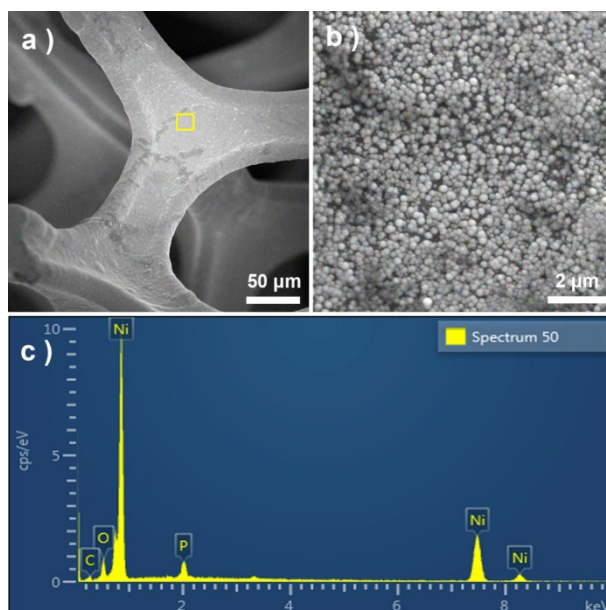

**Figure S3** (a) Low and (b) high magnification SEM images and (c) EDX spectrum of as-deposited Ni-P on Ni foam.

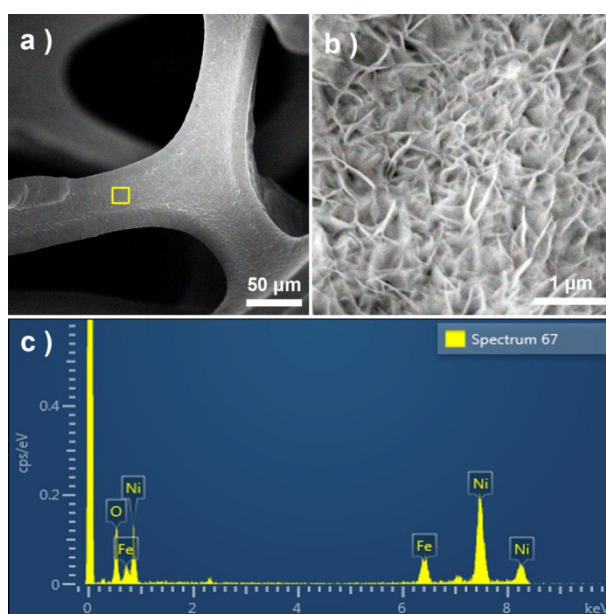

**Figure S4** (a) Low and (b) high magnification SEM images and (c) EDX spectrum of as-deposited NiFe-OH on Ni foam.

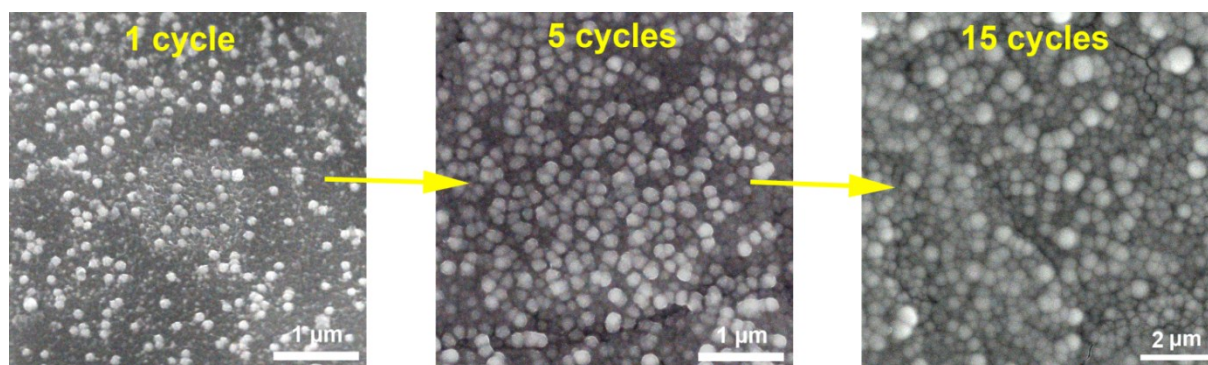

**Figure S5** Surface morphology evolution of NiFe-P during electrodeposition at CV mode.

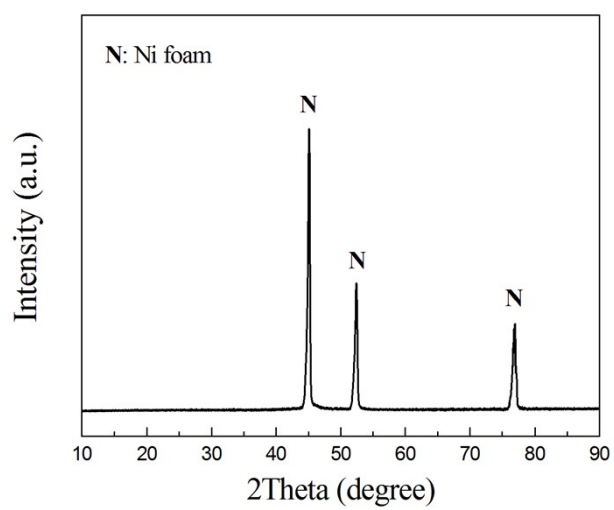

**Figure S6** XRD spectra of as-obtained NiFe-P.

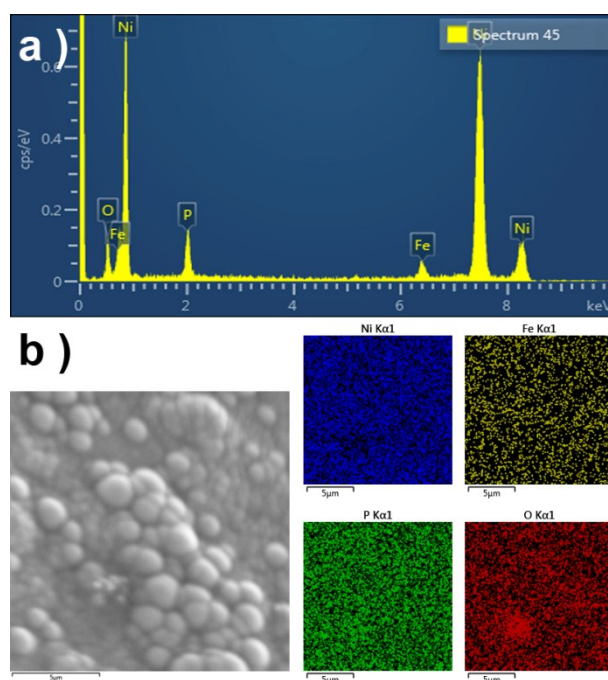

**Figure S7** (a) EDX spectrum and (b) EDX mapping images of the as-prepared NiFe-P.

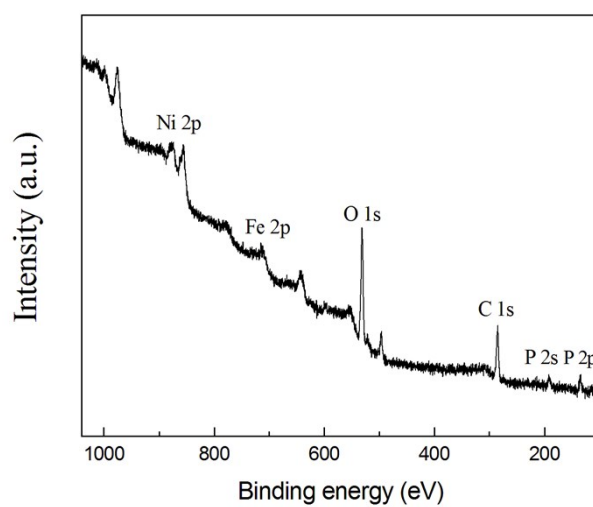

**Figure S8** XPS survey spectrum of as-prepared NiFe-P.

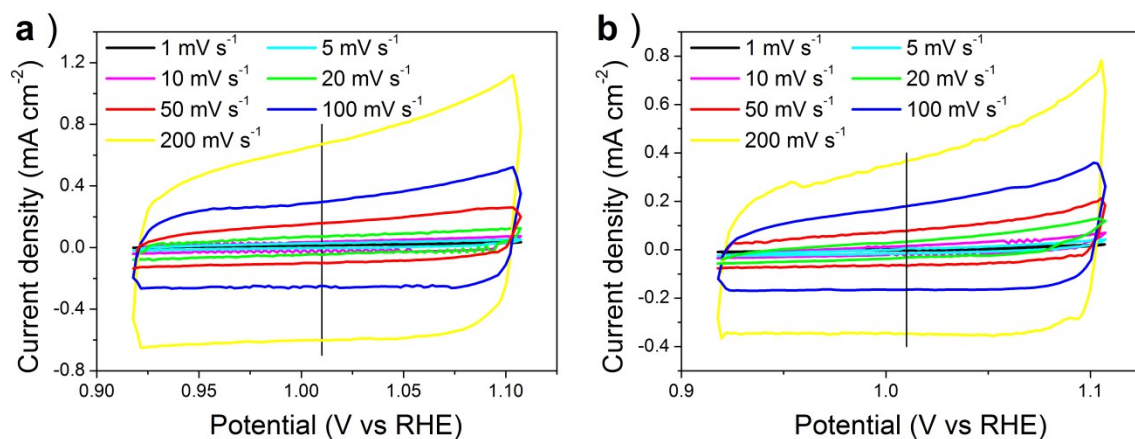

**Figure S9** CV curves of (a) NiFe-P and (b) Ni-P obtained at 0.917~1.107 V vs RHE with different potential scanning rates.

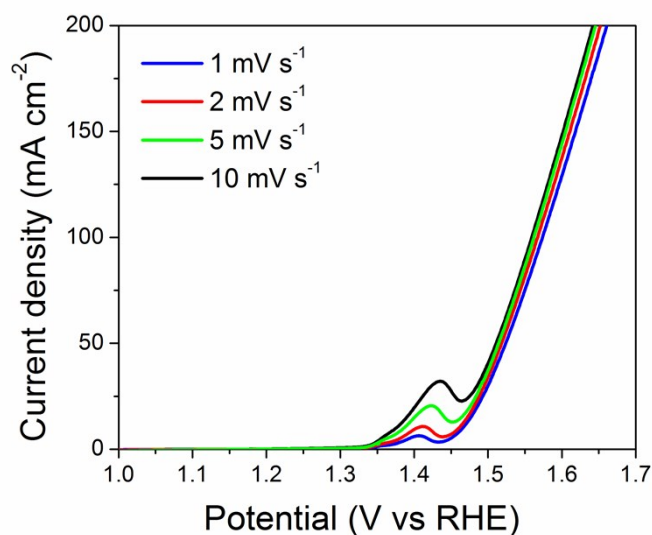

**Figure S10** Polarization curves of NiFe-P catalyst obtained in 1 M KOH under various potential scanning rates.

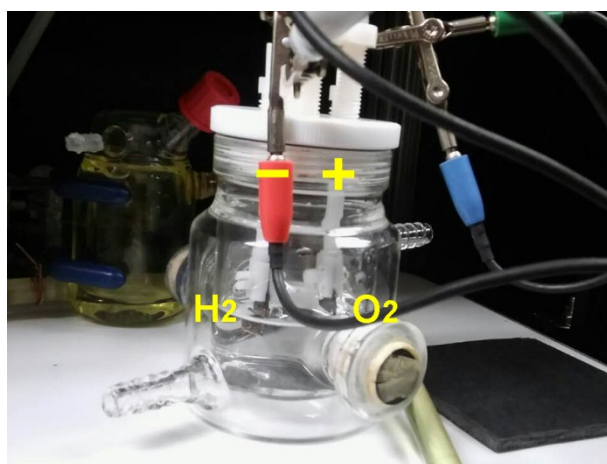

**Figure S11** Photograph of two-electrode electrochemical cell for overall water splitting

**Table S1** Comparison of various bifunctional electrocatalysts for overall water splitting

| Catalyst                                   | $j$<br>(mA cm <sup>-2</sup> ) | $\eta_j$<br>(mV)         | Reference                                                   |
|--------------------------------------------|-------------------------------|--------------------------|-------------------------------------------------------------|
| NiFe phosphates                            | <b>10</b><br><b>20</b>        | <b>326</b><br><b>385</b> | <b>This work</b>                                            |
| NiFe LDHs                                  | 10                            | 470                      | <i>Science</i> <b>2014</b> , 345, 1593                      |
| Ni phosphorous nanoparticles               | 10                            | 450                      | <i>J. Power Sources</i> <b>2015</b> , 299, 342              |
| Ni <sub>5</sub> P <sub>4</sub> films       | 10                            | 470                      | <i>Angew. Chem. Int. Ed.</i> <b>2015</b> , 54, 12361        |
| NiCo <sub>2</sub> S <sub>4</sub> nanowires | 10                            | 450                      | <i>Nanoscale</i> <b>2015</b> , 7, 15122                     |
| Fe phosphide nanotubes                     | 10                            | 460                      | <i>Chemistry—A European Journal</i> <b>2015</b> , 21, 18062 |
| Co phosphorous films                       | 10                            | 420                      | <i>Angew. Chem. Int. Ed.</i> <b>2015</b> , 54, 6251         |
| CoO <sub>x</sub> /N-doped Carbon           | 20                            | 320                      | <i>J. Am. Chem. Soc.</i> , <b>2015</b> , 137, 2688          |
| Ni phosphorous films                       | 10                            | 440                      | <i>ChemCatChem</i> <b>2016</b> , 8, 106                     |
| CoMn phosphide nanoparticles               | 10                            | 330                      | <i>J. Am. Chem. Soc.</i> <b>2016</b> , 138, 4006            |
| Nanoporous CoFe phosphides                 | 10                            | 300                      | <i>Energy Environ. Sci.</i> <b>2016</b> , 9, 2257           |
| CoO <sub>x</sub> -CoSe films               | 20                            | 430                      | <i>J. Mater. Chem. A</i> <b>2016</b> , 4, 10933             |
